# Supplementary material for: Protein Evolution by Molecular Tinkering: Diversification of the Nuclear Receptor Superfamily from a Ligand-Dependent Ancestor
Source: PLOS journal article supplement (doi:10.1371/journal.pbio.1000497), 2010-10-05
Supplement: S10 (10.1371/journal.pbio.1000497.s010) [file journal.pbio.1000497.s010]

Table S1. Species, taxonomy, receptor abbreviations, and accession numbers of the nuclear receptor sequences used in the phylogenetic analyses.

| Species Name                    | Common Name            | Phylum          | Lineage/Superphylum | Abbreviation   | Accession #              | Database                                                                                                       |
|---------------------------------|------------------------|-----------------|---------------------|----------------|--------------------------|----------------------------------------------------------------------------------------------------------------|
| <i>Acropora millepora</i>       | coral                  | Anthozoa        | Cnidaria            | AcrMilNR2      | Q95WG3                   | UniPROTKB/TrEMBL                                                                                               |
|                                 |                        |                 |                     | AcrMilNR6      | Q95WF8                   | UniPROTKB/TrEMBL                                                                                               |
|                                 |                        |                 |                     | AcrMilNR4      | Q95WG1                   | UniPROTKB/TrEMBL                                                                                               |
|                                 |                        |                 |                     | AcrMilNR7      | Q95WF7                   | UniPROTKB/TrEMBL                                                                                               |
|                                 |                        |                 |                     | AcrMilNR8      | Q95WF6                   | UniPROTKB/TrEMBL                                                                                               |
|                                 |                        |                 |                     | AcrMITLL       | Q95WG4                   | UniPROTKB/TrEMBL                                                                                               |
| <i>Amblyomma americanum</i>     | tick                   | Arthropoda      | Ecdysozoa           | AmbAmeEcR      | O44337                   | UniPROTKB/TrEMBL                                                                                               |
|                                 |                        |                 |                     | AmbAmeRXR      | O61448                   | UniPROTKB/TrEMBL                                                                                               |
| <i>Amphimedon queenslandica</i> | sponge                 | Demospongia     | Porifera            | AmpQueNR1      | ACA04755                 | Genbank                                                                                                        |
|                                 |                        |                 |                     | AmpQueNR2      | GU811658                 | Genbank                                                                                                        |
| <i>Aplysia californica</i>      | sea slug               | Mollusca        | Lophotrochozoa      | ApCaIER        | O6VU64                   | UniPROTKB/TrEMBL                                                                                               |
| <i>Biomphalaria glabrata</i>    | blood fluke            | Mollusca        | Lophotrochozoa      | BioGlaRXR      | O8T5C6                   | UniPROTKB/TrEMBL                                                                                               |
| <i>Bombyx mori</i>              | silkworm               | Arthropoda      | Ecdysozoa           | BomMorGRF      | O9Y1L8                   | UniPROTKB/TrEMBL                                                                                               |
| <i>Branchiostoma floridae</i>   | amphioxus              | Cephalochordata | Cephalochordata     | BraFloCP       | Q86GV5                   | UniPROTKB/TrEMBL                                                                                               |
|                                 |                        |                 |                     | BraFloNR1      | Brafl1:174225            | JGI                                                                                                            |
|                                 |                        |                 |                     | BraFloNR2      | Brafl1:124680            | JGI                                                                                                            |
|                                 |                        |                 |                     | BraFloNR3      | Brafl1:124681            | JGI                                                                                                            |
|                                 |                        |                 |                     | BraFloNR4      | Brafl1:128090            | JGI                                                                                                            |
|                                 |                        |                 |                     | BraFloNR5      | Brafl1:67032             | JGI                                                                                                            |
|                                 |                        |                 |                     | BraFloERR      | Q5XTR0                   | UniPROTKB/TrEMBL                                                                                               |
|                                 |                        |                 |                     | BraFloNR6      | Brafl1:222287            | JGI                                                                                                            |
|                                 |                        |                 |                     | BraFloNR7      | Brafl1:84128             | JGI                                                                                                            |
|                                 |                        |                 |                     | BraFloNR8      | Brafl1:174611            | JGI                                                                                                            |
|                                 |                        |                 |                     | BraFloRAR      | Q8MX80                   | UniPROTKB/TrEMBL                                                                                               |
|                                 |                        |                 |                     | BraFloER       | EU371730                 | Genbank                                                                                                        |
|                                 |                        |                 |                     | BraFloRXR      | Q8MX78                   | UniPROTKB/TrEMBL                                                                                               |
|                                 |                        |                 |                     | BraFloSR       | EU371729                 | Genbank                                                                                                        |
|                                 |                        |                 |                     | BraFloTH       | A7L5U9                   | UniPROTKB/TrEMBL                                                                                               |
|                                 |                        |                 |                     | BraFloTR24     | Q8MX79                   | UniPROTKB/TrEMBL                                                                                               |
| <i>Capitella capitata</i>       | bristle worm           | Polychaeta      | Lophotrochozoa      | CapCapNR1      | Capca1:219555            | JGI                                                                                                            |
|                                 |                        |                 |                     | CapCapNR2      | Capca1:222512            | JGI                                                                                                            |
|                                 |                        |                 |                     | CapCapNR3      | Capca1:226941            | JGI                                                                                                            |
|                                 |                        |                 |                     | CapCapNR4      | Capca1:227484            | JGI                                                                                                            |
|                                 |                        |                 |                     | CapCapNR5      | Capca1:227950            | JGI                                                                                                            |
|                                 |                        |                 |                     | CapCapNR6      | Capca1:62897             | JGI                                                                                                            |
|                                 |                        |                 |                     | CapCapNR7      | Capca1:224945            | JGI                                                                                                            |
|                                 |                        |                 |                     | CapCapNR8      | Capca1:168520            | JGI                                                                                                            |
|                                 |                        |                 |                     | CapCapNR9      | Capca1:167148            | JGI                                                                                                            |
|                                 |                        |                 |                     | CapCapNR10     | Capca1:93472             | JGI                                                                                                            |
| <i>Carcinus maenas</i>          | green crab             | Crustacea       | Ecdysozoa           | CarMaeEcR      | Q6RIB4                   | UniPROTKB/TrEMBL                                                                                               |
| <i>Celaca pugilator</i>         | atlantic fiddler crab  | Crustacea       | Ecdysozoa           | CelPugEcR      | O76246                   | UniPROTKB/TrEMBL                                                                                               |
|                                 |                        |                 |                     | CelPugRXR      | O76241                   | UniPROTKB/TrEMBL                                                                                               |
| <i>Ciona intestinalis</i>       | transparent sea squirt | Ascidiacea      | Urochordata         | CioIntNR1      | ci0100142690             | JGI                                                                                                            |
|                                 |                        |                 |                     | CioIntNR2      | ci0100150442             | JGI                                                                                                            |
|                                 |                        |                 |                     | CioIntNR3      | ci0100139008             | JGI                                                                                                            |
|                                 |                        |                 |                     | CioIntNR4      | ci0100145000             | JGI                                                                                                            |
|                                 |                        |                 |                     | CioIntNR5      | ci0100146308             | JGI                                                                                                            |
|                                 |                        |                 |                     | CioIntNR6      | grail.125.34.1           | JGI                                                                                                            |
|                                 |                        |                 |                     | CioIntNR7      | grail.343.2.1            | JGI                                                                                                            |
|                                 |                        |                 |                     | CioIntNR8      | ci0100153345             | JGI                                                                                                            |
|                                 |                        |                 |                     | CioIntNR9      | ci0100143297             | JGI                                                                                                            |
|                                 |                        |                 |                     | CioIntNR10     | ci0100135919             | JGI                                                                                                            |
|                                 |                        |                 |                     | CioIntNR11     | ci0100150561             | JGI                                                                                                            |
|                                 |                        |                 |                     | CioIntThR      | Q4H2P4                   | UniPROTKB/TrEMBL                                                                                               |
|                                 |                        |                 |                     | CioIntTR2/4    | Q1RPY8                   | UniPROTKB/TrEMBL                                                                                               |
|                                 |                        |                 |                     | CioIntNR12     | ci0100135732             | JGI                                                                                                            |
|                                 |                        |                 |                     | CioIntNR13     | ci0100152224             | JGI                                                                                                            |
|                                 |                        |                 |                     | CioIntNR14     | ci0100147513             | JGI                                                                                                            |
| <i>Drosophila melanogaster</i>  | fruit fly              | Arthropoda      | Ecdysozoa           | DroMelDSF      | O96680                   | UniPROTKB/TrEMBL                                                                                               |
|                                 |                        |                 |                     | DroMelE75      | P17671                   | UniPROTKB/TrEMBL                                                                                               |
|                                 |                        |                 |                     | DroMelE78      | P45447                   | UniPROTKB/TrEMBL                                                                                               |
|                                 |                        |                 |                     | DroMelEcR      | P34021                   | UniPROTKB/TrEMBL                                                                                               |
|                                 |                        |                 |                     | DroMelERR      | Q9VSE9                   | UniPROTKB/TrEMBL                                                                                               |
|                                 |                        |                 |                     | DroMelFAX1     | Q9V112                   | UniPROTKB/TrEMBL                                                                                               |
|                                 |                        |                 |                     | DroMelFTZF1    | P33244                   | UniPROTKB/TrEMBL                                                                                               |
|                                 |                        |                 |                     | DroMelGRF/HR4  | Q9W539                   | UniPROTKB/TrEMBL                                                                                               |
|                                 |                        |                 |                     | DroMelHNF4     | P49866                   | UniPROTKB/TrEMBL                                                                                               |
|                                 |                        |                 |                     | DroMelHR3      | P31396                   | UniPROTKB/TrEMBL                                                                                               |
|                                 |                        |                 |                     | DroMelHR38     | P49869                   | UniPROTKB/TrEMBL                                                                                               |
|                                 |                        |                 |                     | DroMelHR39     | Q05192                   | UniPROTKB/TrEMBL                                                                                               |
|                                 |                        |                 |                     | DroMelHR78     | Q24142                   | UniPROTKB/TrEMBL                                                                                               |
|                                 |                        |                 |                     | DroMelHR96     | Q24143                   | UniPROTKB/TrEMBL                                                                                               |
|                                 |                        |                 |                     | DroMelPNR/HR51 | A12A01                   | UniPROTKB/TrEMBL                                                                                               |
|                                 |                        |                 |                     | DroMelSVP      | Q8MRP3                   | UniPROTKB/TrEMBL                                                                                               |
|                                 |                        |                 |                     | DroMelTLL      | P18102                   | UniPROTKB/TrEMBL                                                                                               |
|                                 |                        |                 |                     | DroMelUSP      | P20153                   | UniPROTKB/TrEMBL                                                                                               |
| <i>Fugu rubripes</i>            | Japanese pufferfish    | Euteleostomi    | Vertebrata          | FugRubNR1      | SINFRUP00000051057       | GTD; Genomic threading Database, <a href="http://bioinf.cs.ucl.ac.uk/GTD/">http://bioinf.cs.ucl.ac.uk/GTD/</a> |
|                                 |                        |                 |                     | FugRubNR2      | SINFRUP000000052715      | GTD; Genomic threading Database, <a href="http://bioinf.cs.ucl.ac.uk/GTD/">http://bioinf.cs.ucl.ac.uk/GTD/</a> |
|                                 |                        |                 |                     | FugRubNR3      | SINFRUP000000054267      | GTD; Genomic threading Database, <a href="http://bioinf.cs.ucl.ac.uk/GTD/">http://bioinf.cs.ucl.ac.uk/GTD/</a> |
|                                 |                        |                 |                     | FugRubNR4      | SINFRUP000000057192      | GTD; Genomic threading Database, <a href="http://bioinf.cs.ucl.ac.uk/GTD/">http://bioinf.cs.ucl.ac.uk/GTD/</a> |
|                                 |                        |                 |                     | FugRubNR5      | SINFRUP000000057832      | GTD; Genomic threading Database, <a href="http://bioinf.cs.ucl.ac.uk/GTD/">http://bioinf.cs.ucl.ac.uk/GTD/</a> |
|                                 |                        |                 |                     | FugRubNR6      | SINFRUP000000058046      | GTD; Genomic threading Database, <a href="http://bioinf.cs.ucl.ac.uk/GTD/">http://bioinf.cs.ucl.ac.uk/GTD/</a> |
|                                 |                        |                 |                     | FugRubNR7      | SINFRUP000000059292      | GTD; Genomic threading Database, <a href="http://bioinf.cs.ucl.ac.uk/GTD/">http://bioinf.cs.ucl.ac.uk/GTD/</a> |
|                                 |                        |                 |                     | FugRubNR8      | SINFRUP000000059880      | GTD; Genomic threading Database, <a href="http://bioinf.cs.ucl.ac.uk/GTD/">http://bioinf.cs.ucl.ac.uk/GTD/</a> |
|                                 |                        |                 |                     | FugRubNR9      | SINFRUP000000061614 - 15 | GTD; Genomic threading Database, <a href="http://bioinf.cs.ucl.ac.uk/GTD/">http://bioinf.cs.ucl.ac.uk/GTD/</a> |
|                                 |                        |                 |                     | FugRubNR10     | SINFRUP000000062437      | GTD; Genomic threading Database, <a href="http://bioinf.cs.ucl.ac.uk/GTD/">http://bioinf.cs.ucl.ac.uk/GTD/</a> |
|                                 |                        |                 |                     | FugRubNR11     | SINFRUP000000062708      | GTD; Genomic threading Database, <a href="http://bioinf.cs.ucl.ac.uk/GTD/">http://bioinf.cs.ucl.ac.uk/GTD/</a> |
|                                 |                        |                 |                     | FugRubNR12     | SINFRUP000000063957      | GTD; Genomic threading Database, <a href="http://bioinf.cs.ucl.ac.uk/GTD/">http://bioinf.cs.ucl.ac.uk/GTD/</a> |
|                                 |                        |                 |                     | FugRubNR13     | SINFRUP000000064369      | GTD; Genomic threading Database, <a href="http://bioinf.cs.ucl.ac.uk/GTD/">http://bioinf.cs.ucl.ac.uk/GTD/</a> |
|                                 |                        |                 |                     | FugRubNR14     | SINFRUP000000064603      | GTD; Genomic threading Database, <a href="http://bioinf.cs.ucl.ac.uk/GTD/">http://bioinf.cs.ucl.ac.uk/GTD/</a> |
|                                 |                        |                 |                     | FugRubNR15     | SINFRUP000000064685      | GTD; Genomic threading Database, <a href="http://bioinf.cs.ucl.ac.uk/GTD/">http://bioinf.cs.ucl.ac.uk/GTD/</a> |
|                                 |                        |                 |                     | FugRubNR16     | SINFRUP000000065825      | GTD; Genomic threading Database, <a href="http://bioinf.cs.ucl.ac.uk/GTD/">http://bioinf.cs.ucl.ac.uk/GTD/</a> |
|                                 |                        |                 |                     | FugRubNR17     | SINFRUP000000065176      | GTD; Genomic threading Database, <a href="http://bioinf.cs.ucl.ac.uk/GTD/">http://bioinf.cs.ucl.ac.uk/GTD/</a> |
|                                 |                        |                 |                     | FugRubNR18     | SINFRUP000000067205      | GTD; Genomic threading Database, <a href="http://bioinf.cs.ucl.ac.uk/GTD/">http://bioinf.cs.ucl.ac.uk/GTD/</a> |
|                                 |                        |                 |                     | FugRubNR19     | SINFRUP000000069536      | GTD; Genomic threading Database, <a href="http://bioinf.cs.ucl.ac.uk/GTD/">http://bioinf.cs.ucl.ac.uk/GTD/</a> |
|                                 |                        |                 |                     | FugRubNR20     | SINFRUP000000069756      | GTD; Genomic threading Database, <a href="http://bioinf.cs.ucl.ac.uk/GTD/">http://bioinf.cs.ucl.ac.uk/GTD/</a> |
|                                 |                        |                 |                     | FugRubNR21     | SINFRUP000000070604      | GTD; Genomic threading Database, <a href="http://bioinf.cs.ucl.ac.uk/GTD/">http://bioinf.cs.ucl.ac.uk/GTD/</a> |
|                                 |                        |                 |                     | FugRubNR22     | SINFRUP000000070767      | GTD; Genomic threading Database, <a href="http://bioinf.cs.ucl.ac.uk/GTD/">http://bioinf.cs.ucl.ac.uk/GTD/</a> |
|                                 |                        |                 |                     | FugRubNR23     | SINFRUP000000070795      | GTD; Genomic threading Database, <a href="http://bioinf.cs.ucl.ac.uk/GTD/">http://bioinf.cs.ucl.ac.uk/GTD/</a> |
|                                 |                        |                 |                     | FugRubNR24     | SINFRUP000000071164      | GTD; Genomic threading Database, <a href="http://bioinf.cs.ucl.ac.uk/GTD/">http://bioinf.cs.ucl.ac.uk/GTD/</a> |
|                                 |                        |                 |                     | FugRubNR25     | SINFRUP000000071695      | GTD; Genomic threading Database, <a href="http://bioinf.cs.ucl.ac.uk/GTD/">http://bioinf.cs.ucl.ac.uk/GTD/</a> |
|                                 |                        |                 |                     | FugRubNR26     | SINFRUP000000072134      | GTD; Genomic threading Database, <a href="http://bioinf.cs.ucl.ac.uk/GTD/">http://bioinf.cs.ucl.ac.uk/GTD/</a> |
|                                 |                        |                 |                     | FugRubNR27     | SINFRUP000000072315      | GTD; Genomic threading Database, <a href="http://bioinf.cs.ucl.ac.uk/GTD/">http://bioinf.cs.ucl.ac.uk/GTD/</a> |
|                                 |                        |                 |                     | FugRubNR28     | SINFRUP000000073157      | GTD; Genomic threading Database, <a href="http://bioinf.cs.ucl.ac.uk/GTD/">http://bioinf.cs.ucl.ac.uk/GTD/</a> |
|                                 |                        |                 |                     | FugRubNR29     | SINFRUP000000074502      | GTD; Genomic threading Database, <a href="http://bioinf.cs.ucl.ac.uk/GTD/">http://bioinf.cs.ucl.ac.uk/GTD/</a> |
|                                 |                        |                 |                     | FugRubNR30     | SINFRUP000000074673      | GTD; Genomic threading Database, <a href="http://bioinf.cs.ucl.ac.uk/GTD/">http://bioinf.cs.ucl.ac.uk/GTD/</a> |
|                                 |                        |                 |                     | FugRubNR31     | SINFRUP000000076812      | GTD; Genomic threading Database, <a href="http://bioinf.cs.ucl.ac.uk/GTD/">http://bioinf.cs.ucl.ac.uk/GTD/</a> |
|                                 |                        |                 |                     | FugRubNR32     | SINFRUP000000077845      | GTD; Genomic threading Database, <a href="http://bioinf.cs.ucl.ac.uk/GTD/">http://bioinf.cs.ucl.ac.uk/GTD/</a> |
|                                 |                        |                 |                     | FugRubNR33     | SINFRUP000000079088      | GTD; Genomic threading Database, <a href="http://bioinf.cs.ucl.ac.uk/GTD/">http://bioinf.cs.ucl.ac.uk/GTD/</a> |
|                                 |                        |                 |                     | FugRubNR34     | SINFRUP000000079602      | GTD; Genomic threading Database, <a href="http://bioinf.cs.ucl.ac.uk/GTD/">http://bioinf.cs.ucl.ac.uk/GTD/</a> |
|                                 |                        |                 |                     | FugRubNR35     | SINFRUP000000080805      | GTD; Genomic threading Database, <a href="http://bioinf.cs.ucl.ac.uk/GTD/">http://bioinf.cs.ucl.ac.uk/GTD/</a> |
|                                 |                        |                 |                     | FugRubNR36     | SINFRUP000000080916      | GTD; Genomic threading Database, <a href="http://bioinf.cs.ucl.ac.uk/GTD/">http://bioinf.cs.ucl.ac.uk/GTD/</a> |
|                                 |                        |                 |                     | FugRubNR37     | SINFRUP000000081538      | GTD; Genomic threading Database, <a href="http://bioinf.cs.ucl.ac.uk/GTD/">http://bioinf.cs.ucl.ac.uk/GTD/</a> |
|                                 |                        |                 |                     | FugRubNR38     | SINFRUP000000082389      | GTD; Genomic threading Database, <a href="http://bioinf.cs.ucl.ac.uk/GTD/">http://bioinf.cs.ucl.ac.uk/GTD/</a> |
|                                 |                        |                 |                     | FugRubNR39     | SINFRUP000000085838      | GTD; Genomic threading Database, <a href="http://bioinf.cs.ucl.ac.uk/GTD/">http://bioinf.cs.ucl.ac.uk/GTD/</a> |
|                                 |                        |                 |                     | FugRubNR40     | SINFRUP000000090296      | GTD; Genomic threading Database, <a href="http://bioinf.cs.ucl.ac.uk/GTD/">http://bioinf.cs.ucl.ac.uk/GTD/</a> |
|                                 |                        |                 |                     | FugRubNR41     | SINFRUP000000091008      | GTD; Genomic threading Database, <a href="http://bioinf.cs.ucl.ac.uk/GTD/">http://bioinf.cs.ucl.ac.uk/GTD/</a> |
|                                 |                        |                 |                     | FugRubNR42     | SINFRUP000000079067      | GTD; Genomic threading Database, <a href="http://bioinf.cs.ucl.ac.uk/GTD/">http://bioinf.cs.ucl.ac.uk/GTD/</a> |
|                                 |                        |                 |                     | FugRubNR43     | SINFRUP000000087448      | GTD; Genomic threading Database, <a href="http://bioinf.cs.ucl.ac.uk/GTD/">http://bioinf.cs.ucl.ac.uk/GTD/</a> |
|                                 |                        |                 |                     |                | SINFRUP000000054948      | GTD; Genomic threading Database, <a href="http://bioinf.cs.ucl.ac.uk/GTD/">http://bioinf.cs.ucl.ac.uk/GTD/</a> |

[illegible]

|                                      |                          |              |                |            |                |                  |
|--------------------------------------|--------------------------|--------------|----------------|------------|----------------|------------------|
| <i>Platynereis dumerilli</i>         | polychaete worm          | Annelida     | Lophotrochozoa | PlaDumER   | C0IR13         | UniPROTKB/TrEMBL |
| <i>Pocillopora damicornis</i>        | bird's nest coral        | Anthozoa     | Cnidaria       | PocDamNR6  | A7L8D5         | UniPROTKB/TrEMBL |
| <i>Polyandrocarpa misakiensis</i>    |                          | Ascidacea    | Urochordata    | PolMisRAR  | P91779         | UniPROTKB/TrEMBL |
|                                      |                          |              |                | PolMisRXR  | Q9UAF1         | UniPROTKB/TrEMBL |
| <i>Saccoglossus kowalevskii</i>      | acorn worm               |              | Hemichordata   | SacKowTLL  | Q7YTB9         | UniPROTKB/TrEMBL |
| <i>Schistosoma mansoni</i>           |                          |              |                | SchManTR24 | Q4KXQ1         | UniPROTKB/TrEMBL |
|                                      |                          |              |                | SchManFTZF | Q9BPL0         | UniPROTKB/TrEMBL |
| <i>Strongylocentrotus purpuratus</i> | purple sea urchin        | Echinoidea   | Echinodermata  | StrPurNR1  | UPI0000584A1E  | NCBI             |
|                                      |                          |              |                | StrPurNR2  | XP_782295.1    | NCBI             |
|                                      |                          |              |                | StrPurNR3  | XP_785820.1    | NCBI             |
|                                      |                          |              |                | StrPurNR4  | XP_784483      | NCBI             |
|                                      |                          |              |                | StrPurNR5  | XP_791919.1    | NCBI             |
|                                      |                          |              |                | StrPurNR6  | UPI0000586F42  | SMART            |
|                                      |                          |              |                | StrPurNR7  | UPI0000E469E4  | SMART            |
|                                      |                          |              |                | StrPurNR8  | NP_001020384.1 | NCBI             |
|                                      |                          |              |                | StrPurNR9  | XP_780389.1    | NCBI             |
|                                      |                          |              |                | StrPurNR10 | XP_779997.1    | NCBI             |
|                                      |                          |              |                | StrPurNR11 | UPI0000E4819E  | SMART            |
|                                      |                          |              |                | StrPurNR12 | XP_786266.1    | NCBI             |
|                                      |                          |              |                | StrPurNR13 | XP_795547.1    | NCBI             |
|                                      |                          |              |                | StrPurNR14 | XP_780706.1    | NCBI             |
|                                      |                          |              |                | StrPurNR15 | XP_795547      | NCBI             |
|                                      |                          |              |                | StrPurNR16 | XP_781750.1    | NCBI             |
|                                      |                          |              |                | StrPurNR17 | XP_784429.2    | NCBI             |
|                                      |                          |              |                | StrPurNR18 | XP_779976.1    | NCBI             |
|                                      |                          |              |                | StrPurNR19 | XP_784691.1    | NCBI             |
|                                      |                          |              |                | StrPurNR20 | XP_001201896   | NCBI             |
|                                      |                          |              |                | StrPurNR21 | XP_792757.1    | NCBI             |
|                                      |                          |              |                | StrPurNR22 | XP_789465.1    | NCBI             |
|                                      |                          |              |                | StrPurNR23 | XP_782884.1    | NCBI             |
|                                      |                          |              |                | StrPurNR24 | UPI0000E4834A  | SMART            |
| <i>Suberites domuncula</i>           | sponge                   | Demospongia  | Porifera       | SubDomRXR  | Q8I748         | UniPROTKB/TrEMBL |
| <i>Scyliorhinus canicula</i>         | smaller spotted catshark | Elasmobranch | Vertebrata     | SycCanCP   | AAS49607       | Genbank          |
|                                      |                          |              |                | SycCanTH   | ABS11251       | Genbank          |
| <i>Thais clavigera</i>               | whelk                    | Gastropoda   | Mollusca       | ThaClaER   | Q86B27         | UniPROTKB/TrEMBL |
|                                      |                          |              |                | ThaClaRXR  | Q66TQ0         | UniPROTKB/TrEMBL |
| <i>Trichoplax adhaerens</i>          |                          |              | Placozoa       | TriAdhCP   | Triad1:21656   | JGI              |
|                                      |                          |              |                | TriAdhERR  | Triad1:16711   | JGI              |
|                                      |                          |              |                | TriAdhHNF4 | Triad1:50786   | JGI              |
|                                      |                          |              |                | TriAdhRXR  | Triad1:49897   | JGI              |
| <i>Tripedalia cystophora</i>         | box jelly                | Cubozoa      | Cnidaria       | TriCysRXR  | O96562         | UniPROTKB/TrEMBL |
