# Supplementary material for: Protein Evolution by Molecular Tinkering: Diversification of the Nuclear Receptor Superfamily from a Ligand-Dependent Ancestor
Source: PLOS journal article supplement (doi:10.1371/journal.pbio.1000497), 2010-10-05
Supplement: S11 (10.1371/journal.pbio.1000497.s011) [file journal.pbio.1000497.s011]

| Receptor           | Mutation | Effect                                                                                                                                                | Citation                                        |
|--------------------|----------|-------------------------------------------------------------------------------------------------------------------------------------------------------|-------------------------------------------------|
| Human ER $\alpha$  | A350F    | Constitutive activity                                                                                                                                 | Chen et al., J. Biol. Chem. 276:28645, 2001     |
| Human ER $\alpha$  | E380Q    | Constitutive activity                                                                                                                                 | Lazennec G, et al., Mol. Endo. 11:1375, 1997    |
| Human ER $\alpha$  | L536A    | Constitutive activity                                                                                                                                 | Zhao et al., J. Biol. Chem. 278:27278, 2003     |
| Human ER $\alpha$  | L536E    | Constitutive activity                                                                                                                                 | Zhao et al., J. Biol. Chem. 278:27278, 2003     |
| Human ER $\alpha$  | L536G    | Constitutive activity                                                                                                                                 | Zhao et al., J. Biol. Chem. 278:27278, 2003     |
| Human ER $\alpha$  | L536K    | Constitutive activity                                                                                                                                 | Zhao et al., J. Biol. Chem. 278:27278, 2003     |
| Human ER $\alpha$  | L536N    | Constitutive activity                                                                                                                                 | Zhao et al., J. Biol. Chem. 278:27278, 2003     |
| Human ER $\alpha$  | Y537A    | Constitutive activity                                                                                                                                 | Weis et al., Mol. Endo. 10:1388, 1996           |
| Human ER $\alpha$  | Y537N    | Constitutive activity                                                                                                                                 | Zhong and Skafar, Biochemistry 41:4209, 2002    |
| Human ER $\alpha$  | Y537S    | Constitutive activity                                                                                                                                 | Weis et al., Mol. Endo. 10:1388, 1996           |
| Human ER $\alpha$  | Y541A    | Constitutive activity                                                                                                                                 | White et al., EMBO J., 16:1427, 1997            |
| Human ER $\alpha$  | Y541D    | Constitutive activity                                                                                                                                 | White et al., EMBO J., 16:1427, 1997            |
| Human ER $\alpha$  | Y541E    | Constitutive activity                                                                                                                                 | White et al., EMBO J., 16:1427, 1997            |
| Human PR           | M759A    | Constitutive activity                                                                                                                                 | Zhang et al., PNAS 102:2707, 2005               |
| Human PR           | M759L    | Constitutive activity                                                                                                                                 | Zhang et al., PNAS 102:2707, 2005               |
| Human PXR          | H407A    | Constitutive activity                                                                                                                                 | Ostberg et al., Eur. J. Biochem. 269:4896, 2002 |
| Human RAR $\alpha$ | A392R    | Constitutive activity                                                                                                                                 | Benko et al., J. Biol. Chem. 278:43797, 2003    |
| Mouse RXR $\alpha$ | F318A    | Constitutive activity                                                                                                                                 | Vivat et al., EMBO J 16:5697, 1997              |
| Mouse RXR $\alpha$ | F318L    | Constitutive activity                                                                                                                                 | Vivat et al., EMBO J 16:5697, 1997              |
| Mouse RXR $\alpha$ | F318V    | Constitutive activity                                                                                                                                 | Vivat et al., EMBO J 16:5697, 1997              |
| Human ERR $\alpha$ | F329A    | Reduced constitutive activity; receptor becomes ligand-activated by antagonists of wild-type receptor, but at levels below that of wild-type baseline | Chen et al., J. Biol. Chem. 276:28645, 2001     |
|                    |          |                                                                                                                                                       |                                                 |

Table S2. Nuclear receptor mutations that cause constitutive activity in liganded receptors or ligand-activation in constitutive receptors without activating ligands. Mutations were identified by querying the Nuclear Receptors Mutations Database as [www.receptors.org](http://www.receptors.org) and by literature searches and verified by consulting the primary publication.
